# Supplementary material
Source: HighWire-hosted journal article supplement (https://jama.ama-assn.org/content/suppl/2009/08/12/302.3.340)
Supplement: pdfpat071509.pdf [file pdfpat071509.pdf]

# Trasplante de células madre hematopoyéticas

Las células madre **hematopoyéticas** (que forman la sangre) son células inmaduras que se desarrollan y se convierten en células sanguíneas maduras en la **médula ósea** (tejido esponjoso que se encuentra en el centro de los huesos donde se forma la sangre), el torrente sanguíneo o en la sangre del cordón umbilical. Por lo tanto, su origen es completamente diferente al de las células madre **embrionarias**, que derivan de las primeras etapas de desarrollo y tienen la posibilidad de desarrollarse y convertirse en células maduras de cualquier tipo de tejido en el cuerpo. Los trasplantes de células madre sanguíneas y de la médula ósea se están utilizando para tratar diversos trastornos. Existen 3 tipos de trasplantes de células madre hematopoyéticas, según la relación entre el donante y el receptor. Si una persona dona sus propias células, se denomina trasplante **autólogo** de células madre. Si el receptor tiene un gemelo que puede ser su donante, se denomina trasplante **singénico** de células madre. Si el donante es otro hermano o una persona con la que no tiene parentesco alguno, el trasplante de células madre se denomina **allogénico**. En el caso de los trasplantes allogénicos de células madre, se realizan pruebas especiales para asegurar la mayor compatibilidad posible entre el donante y el receptor. Esto es importante porque algunos de los efectos adversos de los trasplantes de células madre están relacionados con las diferencias entre las células del donante y del receptor. El número de *JAMA* del 15 de julio de 2009 incluye un artículo acerca del trasplante de células madre hematopoyéticas.

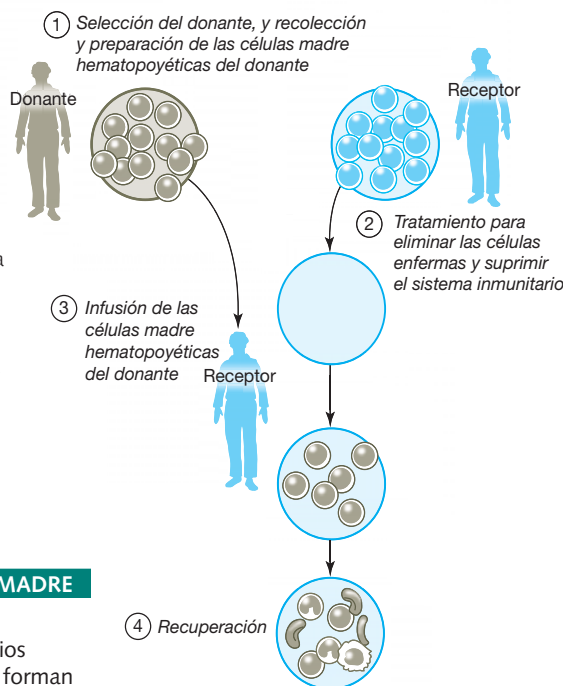

## TRASTORNOS QUE SE PUEDEN TRATAR CON EL TRASPLANTE DE CÉLULAS MADRE

- **Leucemia:** cáncer que afecta los glóbulos blancos
- **Linfoma:** cáncer que afecta las células linfáticas que se encuentran en los ganglios linfáticos; estas células se desplazan por los vasos linfáticos en todo el cuerpo y forman parte del **sistema inmunitario** (el sistema que protege al cuerpo de la invasión de factores externos como infecciones o cánceres)
- **Mieloma múltiple:** cáncer en el que un tipo de glóbulo blanco forma tumores dentro de la médula ósea
- **Anemia aplásica:** una enfermedad que implica la producción insuficiente de glóbulos rojos y blancos, y de plaquetas de la sangre en la médula ósea
- **Talasemia:** una enfermedad de los glóbulos rojos que se produce cuando hay una disminución en la producción de **hemoglobina** (la proteína que permite que los glóbulos rojos transporten oxígeno)
- Trastornos de inmunodeficiencia que provocan una disminución o un funcionamiento deficiente de las células del sistema inmunitario

## RIESGOS DEL TRASPLANTE DE CÉLULAS MADRE HEMATOPOYÉTICAS

- Infecciones, dado que la quimioterapia administrada para destruir las células cancerosas antes del trasplante de células madre debilita en gran medida el sistema inmunitario del receptor, y el nuevo sistema inmunitario necesita tiempo para que pueda desempeñar sus funciones
- Rechazo del trasplante si el sistema inmunitario del receptor destruye las células trasplantadas
- La **enfermedad injerto contra huésped** (graft-versus-host disease, GVHD) se presenta si las células del donante (el injerto) atacan los órganos sanos del receptor (el huésped) y provocan el deterioro de la función de los órganos

Fuente: National Cancer Institute; Centers for Disease Control and Prevention; National Heart, Lung, and Blood Institute

Carolyn J. Hildreth, MD, Redactora

Alison E. Burke, MA, Ilustradora

Richard M. Glass, MD, Editor

La Hoja para el Paciente de JAMA es un servicio al público de JAMA. La información y las recomendaciones que aparecen en esta hoja son adecuadas en la mayoría de los casos, pero no reemplazan el diagnóstico médico. Para obtener información específica relacionada con su afección médica personal, JAMA le sugiere que consulte a su médico. Los médicos y otros profesionales de atención médica pueden fotocopiar esta hoja con fines no comerciales para compartirla con pacientes. Para comprar reimpresiones en grandes cantidades, llame al 312/464-0776.

## PARA OBTENER MÁS INFORMACIÓN

- National Heart, Lung, and Blood Institute (Instituto Nacional del Corazón, los Pulmones y la Sangre)  
[http://www.nhlbi.nih.gov/health/dci/Diseases/bmsct/bmsct\\_all.html](http://www.nhlbi.nih.gov/health/dci/Diseases/bmsct/bmsct_all.html)
- National Marrow Donor Program (Programa Nacional de Donantes de Médula Ósea)  
<http://www.marrow.org>

## INFÓRMESE

Para encontrar esta y otras Hojas para el Paciente de JAMA, vaya al enlace Patient Page (Hoja para el Paciente) del sitio web de JAMA en <http://www.jama.com>. Muchas están disponibles en inglés y español. En el número del 10 de junio de 2009, se publicó una Hoja para el Paciente sobre la leucemia mieloide aguda; en el número del 28 de enero de 2009, se publicó otra sobre la leucemia linfoblástica aguda; y en el número del 9 de mayo de 2007, se publicó otra sobre el linfoma.

**JAMA**  
COPIA PARA  
SUS PACIENTES
